# Supplementary material
Source: MDPI journal article supplement (https://www.mdpi.com/search?q=forests-08-00282)
Supplement: s001 [file forests-08-00282-s001.pdf]

**Table S1.** Important value index, relative density, relative frequency and relative coverage of 20 dominant species of forests at study site 1.

| Sr. no. | Species                                             | Relative density (%) | Relative frequency (%) | Relative coverage (%) | Important value index (%) |
|---------|-----------------------------------------------------|----------------------|------------------------|-----------------------|---------------------------|
| 1       | <i>Xylia dolabriformis</i> Benth.                   | 8.88                 | 3.79                   | 14.13                 | 8.94                      |
| 2       | <i>Tectona grandis</i> Linn.f                       | 8.02                 | 3.79                   | 8.41                  | 6.74                      |
| 3       | <i>Protium serrata</i> (Wall. Ex Colebr.) Engl.     | 5.74                 | 3.10                   | 6.74                  | 5.20                      |
| 4       | <i>Mitragyna rotundifolia</i> (Roxb.) Kuntze        | 6.18                 | 3.45                   | 5.45                  | 5.02                      |
| 5       | <i>Lagerstroemia tomentosa</i> C. Presl             | 5.20                 | 3.79                   | 4.66                  | 4.55                      |
| 6       | <i>Anogeissus acuminata</i> (Roxb. Ex Candolle)     | 5.96                 | 3.45                   | 4.22                  | 4.54                      |
| 7       | <i>Dalbergia kurzii</i> Prain                       | 3.90                 | 2.76                   | 6.11                  | 4.26                      |
| 8       | <i>Stereospermum personatum</i> (Hassk.) Chatterjee | 4.23                 | 3.79                   | 3.64                  | 3.89                      |
| 9       | <i>Millettia brandisiana</i> Kurz                   | 3.90                 | 2.76                   | 3.04                  | 3.23                      |
| 10      | <i>Salmalia insignis</i> (Wall.) Schott & Endl      | 2.06                 | 3.10                   | 1.84                  | 2.33                      |
| 11      | <i>Lannea grandis</i> Engl.                         | 1.73                 | 1.72                   | 2.43                  | 1.96                      |
| 12      | <i>Lagerstroemia villosa</i> Wall. Ex Kurz          | 1.73                 | 1.72                   | 2.16                  | 1.87                      |
| 13      | <i>Terminalia belerica</i> (Gaertn.) Roxb.          | 1.63                 | 2.41                   | 1.39                  | 1.81                      |
| 14      | <i>Sterculia</i> spp.                               | 1.84                 | 2.07                   | 1.45                  | 1.79                      |
| 15      | <i>Lagerstroemia calyculata</i> Kurz                | 1.30                 | 2.41                   | 1.64                  | 1.79                      |
| 16      | <i>Diospyros burmanica</i> Kurz                     | 1.41                 | 1.72                   | 1.65                  | 1.59                      |
| 17      | <i>Tetrameles nudiflora</i> R.Br.                   | 0.98                 | 1.03                   | 2.68                  | 1.56                      |
| 18      | <i>Vitex pubescens</i> Vahl                         | 1.52                 | 1.72                   | 1.41                  | 1.55                      |
| 19      | <i>Dalbergia ovata</i> Grah. Ec Benth.              | 1.30                 | 1.72                   | 1.32                  | 1.45                      |
| 20      | <i>Cratoxylon neriifolium</i> Kurz                  | 1.41                 | 2.07                   | 0.81                  | 1.43                      |

**Table S2.** Important value index, relative density, relative frequency and relative coverage of 20 dominant species of forests at study site 2.

| Sr. no. | Species                                               | Relative density (%) | Relative frequency (%) | Relative coverage (%) | Important value index (%) |
|---------|-------------------------------------------------------|----------------------|------------------------|-----------------------|---------------------------|
| 1       | <i>Xylia dolabriformis</i> Benth.                     | 7.60                 | 3.52                   | 6.76                  | 5.96                      |
| 2       | <i>Cordia grandis</i> Roxb.                           | 4.46                 | 3.52                   | 3.14                  | 3.71                      |
| 3       | <i>Mitragyna rotundifolia</i> (Roxb.) Kuntze          | 4.34                 | 2.73                   | 3.75                  | 3.61                      |
| 4       | <i>Dalbergia cultrata</i> Graham ex Benth.            | 2.90                 | 2.34                   | 4.52                  | 3.25                      |
| 5       | <i>Lannea grandis</i> Engl.                           | 2.77                 | 2.73                   | 4.17                  | 3.23                      |
| 6       | <i>Vitex pubescens</i> Vahl                           | 2.90                 | 2.34                   | 4.25                  | 3.16                      |
| 7       | <i>Garuga pinnata</i> Roxb.                           | 2.53                 | 3.13                   | 3.51                  | 3.06                      |
| 8       | <i>Dillenia pentagyna</i> Roxb.                       | 3.02                 | 2.73                   | 2.46                  | 2.74                      |
| 9       | <i>Tectona grandis</i> Linn.f                         | 3.02                 | 2.73                   | 1.88                  | 2.54                      |
| 10      | <i>Stereospermum fimbriatum</i> Wall. ex G. Don       | 1.69                 | 1.95                   | 3.93                  | 2.52                      |
| 11      | <i>Sterculia</i> spp.                                 | 2.05                 | 1.95                   | 3.19                  | 2.40                      |
| 12      | <i>Dalbergia ovata</i> Grah. Ec Benth.                | 2.29                 | 2.73                   | 1.97                  | 2.33                      |
| 13      | <i>Millettia brandisiana</i> Kurz                     | 2.90                 | 1.56                   | 2.16                  | 2.21                      |
| 14      | <i>Bridelia retusa</i> (L.) Spreng.                   | 2.53                 | 2.34                   | 1.61                  | 2.16                      |
| 15      | <i>Lagerstroemia villosa</i> Wall. Ex Kurz            | 2.17                 | 2.73                   | 1.51                  | 2.14                      |
| 16      | <i>Erythrina suberosa</i> Roxb.                       | 1.93                 | 1.95                   | 2.41                  | 2.10                      |
| 17      | <i>Spondias pinnata</i> (L. f.) Kurz                  | 1.93                 | 2.34                   | 1.93                  | 2.07                      |
| 18      | <i>Protium serrata</i> (Wall. Ex Colebr.) Engl.       | 2.41                 | 1.56                   | 1.90                  | 1.96                      |
| 19      | <i>Berrya</i> spp.                                    | 2.53                 | 2.34                   | 0.99                  | 1.96                      |
| 20      | <i>Haplophragma adenophyllum</i> (Wall. Ex G.Don) Dop | 2.05                 | 1.56                   | 2.24                  | 1.95                      |

**Table S3.** Important value index, relative density, relative frequency and relative coverage of 20 dominant species of forests at study site 3.

| Sr. no. | Species                                             | Relative density (%) | Relative frequency (%) | Relative coverage (%) | Important value index (%) |
|---------|-----------------------------------------------------|----------------------|------------------------|-----------------------|---------------------------|
| 1       | <i>Xylia dolabriformis</i> Benth.                   | 8.00                 | 3.45                   | 12.19                 | 7.88                      |
| 2       | <i>Terminalia tomentosa</i> (Roxb.) Wight & Arn     | 6.27                 | 3.45                   | 7.23                  | 5.65                      |
| 3       | <i>Mitragyna rotundifolia</i> (Roxb.) Kuntze        | 5.90                 | 3.10                   | 4.29                  | 4.43                      |
| 4       | <i>Tectona grandis</i> Linn.f                       | 3.81                 | 3.45                   | 5.66                  | 4.31                      |
| 5       | <i>Protium serrata</i> (Wall. Ex Colebr.) Engl.     | 4.18                 | 3.10                   | 5.41                  | 4.23                      |
| 6       | <i>Salmalia insignis</i> (Wall.) Schott & Endl      | 3.08                 | 3.10                   | 5.87                  | 4.02                      |
| 7       | <i>Lannea grandis</i> Engl.                         | 4.18                 | 3.45                   | 4.13                  | 3.92                      |
| 8       | <i>Dalbergia cultrata</i> Graham ex Benth.          | 4.18                 | 3.10                   | 3.96                  | 3.75                      |
| 9       | <i>Anogeissus acuminata</i> (Roxb. Ex Candolle)     | 4.06                 | 3.45                   | 2.33                  | 3.28                      |
| 10      | <i>Terminalia pyrifolia</i> Kurz                    | 3.20                 | 3.10                   | 3.46                  | 3.25                      |
| 11      | <i>Stereospermum personatum</i> (Hassk.) Chatterjee | 3.08                 | 3.10                   | 2.50                  | 2.89                      |
| 12      | <i>Homalium tomentosum</i> (Vent.) Benth.           | 3.32                 | 2.41                   | 2.82                  | 2.85                      |
| 13      | <i>Gmelina arborea</i> Roxb.                        | 2.83                 | 2.76                   | 2.58                  | 2.72                      |
| 14      | <i>Spondias pinnata</i> (L. f.) Kurz                | 2.21                 | 2.41                   | 2.88                  | 2.50                      |
| 15      | <i>Garuga pinnata</i> Roxb.                         | 2.46                 | 2.76                   | 2.05                  | 2.42                      |
| 16      | <i>Terminalia belerica</i> (Gaertn.) Roxb.          | 1.85                 | 2.07                   | 3.16                  | 2.36                      |
| 17      | <i>Sterculia</i> spp.                               | 1.72                 | 1.72                   | 2.14                  | 1.86                      |
| 18      | <i>Bridelia retusa</i> (L.) Spreng.                 | 1.85                 | 2.07                   | 1.65                  | 1.85                      |
| 19      | <i>Mangifera caloneura</i> Kurz                     | 1.97                 | 2.41                   | 0.98                  | 1.79                      |
| 20      | <i>Erythrina suberosa</i> Roxb.                     | 1.72                 | 2.76                   | 0.82                  | 1.77                      |

**Table S4.** Important value index, relative density, relative frequency and relative coverage of 20 dominant species of forests at study site 4.

| Sr. no. | Species                                         | Relative density (%) | Relative frequency (%) | Relative coverage (%) | Important value index (%) |
|---------|-------------------------------------------------|----------------------|------------------------|-----------------------|---------------------------|
| 1       | <i>Xylia dolabriformis</i> Benth.               | 13.43                | 6.38                   | 15.96                 | 11.93                     |
| 2       | <i>Pentacme siamensis</i> (Miq.) kurz           | 15.30                | 7.09                   | 12.94                 | 11.78                     |
| 3       | <i>Terminalia tomentosa</i> (Roxb.) Wight & Arn | 12.19                | 7.09                   | 13.64                 | 10.97                     |
| 4       | <i>Shorea oblongifolia</i> Thw.                 | 8.71                 | 5.67                   | 8.05                  | 7.48                      |
| 5       | <i>Dipterocarpus tuberculatus</i> Roxb.         | 6.97                 | 2.84                   | 6.57                  | 5.46                      |
| 6       | <i>Azadirachta indica</i> A.Juss.               | 2.86                 | 4.96                   | 2.77                  | 3.53                      |
| 7       | <i>Neonauclea excelsa</i> (Blume) Merr.         | 2.74                 | 4.26                   | 3.53                  | 3.51                      |
| 8       | <i>Mitragyna rotundifolia</i> (Roxb.) Kuntze    | 2.61                 | 3.55                   | 3.25                  | 3.13                      |
| 9       | <i>Tectona grandis</i> Linn.f                   | 2.49                 | 3.55                   | 2.34                  | 2.79                      |
| 10      | <i>Schleichera oleosa</i> (Lour.) Oken          | 1.87                 | 3.55                   | 1.95                  | 2.45                      |
| 11      | <i>Melanorrhoea usitata</i> Wall.               | 2.99                 | 2.13                   | 2.11                  | 2.41                      |
| 12      | <i>Emblica officinalis</i> Gaertn.              | 2.24                 | 2.84                   | 1.50                  | 2.19                      |
| 13      | <i>Anogeissus acuminata</i> (Roxb. Ex Candolle) | 1.74                 | 2.84                   | 1.66                  | 2.08                      |
| 14      | <i>Dillenia parviflora</i> Griff.               | 1.62                 | 2.84                   | 1.41                  | 1.95                      |
| 15      | <i>Adina cordifolia</i> (Roxb.) Brandis         | 1.24                 | 2.84                   | 1.54                  | 1.87                      |
| 16      | <i>Pahudia martabanica</i> Prain                | 1.37                 | 2.13                   | 1.80                  | 1.77                      |
| 17      | <i>Terminalia chebula</i> Retz.                 | 1.37                 | 2.13                   | 1.33                  | 1.61                      |
| 18      | <i>Eugenia</i> spp.                             | 1.37                 | 1.42                   | 1.63                  | 1.47                      |
| 19      | <i>Lagerstroemia villosa</i> Wall. Ex Kurz      | 1.24                 | 1.42                   | 1.68                  | 1.45                      |
| 20      | <i>Millettia pendula</i> Benth.                 | 1.00                 | 2.13                   | 1.17                  | 1.43                      |

**Table S5.** Important value index, relative density, relative frequency and relative coverage of 20 dominant species of forests at study site 5.

| Sr. no. | Species                                         | Relative density (%) | Relative frequency (%) | Relative coverage (%) | Important value index (%) |
|---------|-------------------------------------------------|----------------------|------------------------|-----------------------|---------------------------|
| 1       | <i>Tectona hamiltoniana</i> Wall.               | 19.53                | 6.15                   | 26.55                 | 17.41                     |
| 2       | <i>Xylia dolabriformis</i> Benth.               | 9.04                 | 9.23                   | 10.88                 | 9.72                      |
| 3       | <i>Terminalia oliveri</i> Brandis.              | 10.20                | 6.15                   | 8.01                  | 8.12                      |
| 4       | <i>Terminalia tomentosa</i> (Roxb.) Wight & Arn | 8.16                 | 6.15                   | 7.50                  | 7.27                      |
| 5       | <i>Anogeissus acuminata</i> (Roxb. Ex Candolle) | 7.00                 | 7.69                   | 6.61                  | 7.10                      |
| 6       | <i>Lagerstroemia villosa</i> Wall. Ex Kurz      | 5.83                 | 6.15                   | 4.60                  | 5.53                      |
| 7       | <i>Tectona grandis</i> Linn.f                   | 4.96                 | 6.15                   | 5.46                  | 5.52                      |
| 8       | <i>Hymenodictyon excelsum</i> (Roxb.) Wall.     | 3.50                 | 7.69                   | 4.86                  | 5.35                      |
| 9       | <i>Dipterocarpus tuberculatus</i> Roxb.         | 4.66                 | 3.08                   | 4.32                  | 4.02                      |
| 10      | <i>Acacia catechu</i> (L.f.) Willd.             | 4.08                 | 4.62                   | 2.89                  | 3.86                      |
| 11      | <i>Salmalia insignis</i> (Wall.) Schott & Endl  | 3.50                 | 4.62                   | 3.01                  | 3.71                      |
| 12      | <i>Shorea oblongifolia</i> Thw.                 | 3.79                 | 3.08                   | 3.14                  | 3.33                      |
| 13      | <i>Croton oblongifolius</i> Roxb.               | 2.04                 | 4.62                   | 1.94                  | 2.87                      |
| 14      | <i>Artocarpus heterophyllus</i> Lam.            | 1.46                 | 4.62                   | 1.43                  | 2.50                      |
| 15      | <i>Pterocarpus macrocarpus</i> Kurz             | 2.33                 | 3.08                   | 1.92                  | 2.44                      |
| 16      | <i>Acacia leucophloea</i> (Roxb.) Willd         | 2.04                 | 3.08                   | 1.53                  | 2.22                      |
| 17      | <i>Bauhinia racemosa</i> Lam.                   | 1.75                 | 3.08                   | 1.22                  | 2.02                      |
| 18      | <i>Albizzia odoratissima</i> (L.f.) Benth.      | 1.46                 | 3.08                   | 1.34                  | 1.96                      |
| 19      | <i>Dalbergia oliveri</i> Gamble ex Prain        | 1.46                 | 3.08                   | 1.09                  | 1.87                      |
| 20      | <i>Garuga pinnata</i> Roxb.                     | 1.46                 | 1.54                   | 0.92                  | 1.30                      |

**Table S6.** Tree density and basal area of five study sites.

| Site   | Tree density per ha (tree ha <sup>-1</sup> ) | Basal area per ha (m <sup>2</sup> ha <sup>-1</sup> ) |
|--------|----------------------------------------------|------------------------------------------------------|
| Site 1 | 336 (36.55) <sup>b</sup>                     | 43.41 (2.20) <sup>a</sup>                            |
| Site 2 | 368 (30.03) <sup>a</sup>                     | 41.11 (2.18) <sup>b</sup>                            |
| Site 3 | 325 (24.30) <sup>b</sup>                     | 39.66 (2.20) <sup>b</sup>                            |
| Site 4 | 322 (33.85) <sup>b</sup>                     | 20.23 (2.98) <sup>c</sup>                            |
| Site 5 | 229 (23.11) <sup>c</sup>                     | 8.92 (0.82) <sup>d</sup>                             |

Data are expressed as mean (standard deviation). Different letters show significant differences among the study sites using Duncan multiple range test (DMRT) in ANOVA at a 95% confidence interval.

**Table S7.** Species name and their abbreviations of five study sites.

| No. | Scientific name                                     | Abbreviation |
|-----|-----------------------------------------------------|--------------|
| 1   | <i>Tectona grandis</i> Linn.f                       | Tecg         |
| 2   | <i>Xylia dolabriformis</i> Benth.                   | Xyld         |
| 3   | <i>Acacia catechu</i> (L.f.) Willd.                 | Acae         |
| 4   | <i>Acacia leucophloea</i> (Roxb.) Willd             | Acal         |
| 5   | <i>Adina cordifolia</i> (Roxb.) Brandis             | Adic         |
| 6   | <i>Albizzia chinensis</i> (Osbeck) Merr.            | Albc         |
| 7   | <i>Albizzia lebbek</i> (L.) Benth.                  | Albl         |
| 8   | <i>Albizzia lucida</i> (Roxb.) Benth.               | Alblu        |
| 9   | <i>Albizzia odoratissima</i> (L.f.) Benth.          | Albo         |
| 10  | <i>Albizzia procera</i> (Roxb.) Benth               | Albp         |
| 11  | <i>Anogeissus acuminata</i> (Roxb. Ex Candolle)     | Anoa         |
| 12  | <i>Anthocephalus cadamba</i> (Roxb.) Miq.           | Antc         |
| 13  | <i>Aporosa villosa</i> (Lindl.) Baill.              | Apov         |
| 14  | <i>Artocarpus calophylla</i> Kurz.                  | Artc         |
| 15  | <i>Artocarpus heterophyllus</i> Lam.                | Arth         |
| 16  | <i>Bauhinia acuminata</i> L.                        | Baua         |
| 17  | <i>Bauhinia racemosa</i> Lam.                       | Baur         |
| 18  | <i>Bauhinia variegata</i> L.                        | Bauv         |
| 19  | <i>Berrya</i> spp.                                  | Bers         |
| 20  | <i>Bridelia retusa</i> (L.) Spreng.                 | Brir         |
| 21  | <i>Buchanania lanzan</i> Spreng.                    | Baul         |
| 22  | <i>Careya arborea</i> Roxb.                         | Cara         |
| 23  | <i>Cassia fistula</i> L.                            | Casf         |
| 24  | <i>Cassia renigera</i> Wall. Ex Benth               | Casr         |
| 25  | <i>Chukrasia tabularis</i> M.Roem.                  | Chut         |
| 26  | <i>Cleidion speciflorum</i> Merr.                   | Cles         |
| 27  | <i>Cordia dichotoma</i> G.Forst.                    | Cord         |
| 28  | <i>Cordia grandis</i> Roxb.                         | Corg         |
| 29  | <i>Cratoxylon neriifolium</i> Kurz                  | Cran         |
| 30  | <i>Croton oblongifolius</i> Roxb.                   | Croo         |
| 31  | <i>Dalbergia cultrata</i> Graham ex Benth.          | Dalc         |
| 32  | <i>Dalbergia fusca</i> Pierre                       | Dalf         |
| 33  | <i>Dalbergia kurzii</i> Prain                       | Dalk         |
| 34  | <i>Dalbergia oliveri</i> Gamble ex Prain            | Dalo         |
| 35  | <i>Dalbergia ovata</i> Grah. Ec Benth.              | Dalov        |
| 36  | <i>Derris robusta</i> (Roxb. Ex DC.) Benth          | Derr         |
| 37  | <i>Dichrostachys cinera</i> Wight et Am.            | Dicc         |
| 38  | <i>Dillenia pentagyna</i> Roxb.                     | Dilp         |
| 39  | <i>Dillenia parviflora</i> Griff.                   | Dilpa        |
| 40  | <i>Diospyros burmanica</i> Kurz                     | Diob         |
| 41  | <i>Dipterocarpus tuberculatus</i> Roxb.             | Dipt         |
| 42  | <i>Dipterocarpus grandifloras</i> Blanco            | Dips         |
| 43  | <i>Dolichandrone serrulata</i> (Wall. Ex DC.) Seem. | Dols         |
| 44  | <i>Duabanga grandiflora</i> (Roxb. Ex DC.) Walpers  | Duag         |
| 45  | <i>Emblica officinalis</i> Gaertn.                  | Embo         |
| 46  | <i>Eriolaena candollei</i> Wall.                    | Eric         |

|    |                                                       |       |
|----|-------------------------------------------------------|-------|
| 47 | <i>Erythrina suberosa</i> Roxb.                       | Erys  |
| 48 | <i>Eugenia</i> spp.                                   | Eugs  |
| 49 | <i>Ficus</i> spp.                                     | Fics  |
| 50 | <i>Ficus glomerata</i> Roxb.                          | Ficg  |
| 51 | <i>Ficus roxburghii</i> Wall.                         | Ficr  |
| 52 | <i>Firmiana colorata</i> Roxb.                        | Firc  |
| 53 | <i>Flacourtia cataphracta</i> Roxb. Ex Willd.         | Flac  |
| 54 | <i>Gardenia erythroclada</i> Kurz                     | Gare  |
| 55 | <i>Gardenia turgida</i> Roxb.                         | Gart  |
| 56 | <i>Garuga pinnata</i> Roxb.                           | Garp  |
| 57 | <i>Gmelina arborea</i> Roxb.                          | Gmea  |
| 58 | <i>Grewia tiliaefolia</i> Vahl.                       | Gret  |
| 59 | <i>Haplophragma adenophyllum</i> (Wall. Ex G.Don) Dop | Hapa  |
| 60 | <i>Heterophragma sulfuerum</i>                        | Hets  |
| 61 | <i>Holarrhena antidysenterica</i> (Linn.) Wall.       | Hola  |
| 62 | <i>Holoptelea integrifolia</i> (Roxb.) Planch         | Holi  |
| 63 | <i>Homalium tomentosum</i> (Vent.) Benth.             | Homt  |
| 64 | <i>Hymenodictyon excelsum</i> (Roxb.) Wall.           | Hyme  |
| 65 | <i>Juglans regia</i> L.                               | Jugr  |
| 66 | <i>Kydia calcine</i> Roxb.                            | Kydc  |
| 67 | <i>Lagerstroemia calyculata</i> Kurz                  | Lagc  |
| 68 | <i>Lagerstroemia parviflora</i> Roxb.                 | Lagp  |
| 69 | <i>Lagerstroemia speciosa</i> (L.) Pers.              | Lags  |
| 70 | <i>Lagerstroemia tomentosa</i> C. Presl               | Lagt  |
| 71 | <i>Lagerstroemia venusta</i> Wall.                    | Lagv  |
| 72 | <i>Lagerstroemia villosa</i> Wall. Ex Kurz            | Lagvi |
| 73 | <i>Lannea grandis</i> Engl.                           | Lang  |
| 74 | <i>Limonia acidissima</i> L.                          | Lima  |
| 75 | <i>Linociera terniflora</i> Wall.                     | Lint  |
| 76 | <i>Litsaea monopetalla</i> (Roxb.) Pers.              | Litm  |
| 77 | <i>Macaranga denticulata</i> Muell. Arg.              | Macd  |
| 78 | <i>Mangifera caloneura</i> Kurz                       | Manc  |
| 79 | <i>Mangifera indica</i> L.                            | Mani  |
| 80 | <i>Manglietia insignis</i> Wall.                      | Manin |
| 81 | <i>Markhamia stipulata</i> (Wall.) Seem.              | Mars  |
| 82 | <i>Melaleuca leucadendron</i> Linn.                   | Mell  |
| 83 | <i>Melanorrhoea usitata</i> Wall.                     | Melu  |
| 84 | <i>Miliusa velutina</i> (Dunal) Hook. F. & Thomson    | Milv  |
| 85 | <i>Millettia brandisiana</i> Kurz                     | Milb  |
| 86 | <i>Millettia pendula</i> Benth.                       | Milp  |
| 87 | <i>Mitragyna purvifolia</i> (Roxb.) Korth.            | Mitp  |
| 88 | <i>Mitragyna rotundifolia</i> (Roxb.) Kuntze          | Mitr  |
| 89 | <i>Morinda tinctoria</i> Roxb.                        | Mort  |
| 90 | <i>Neonauclea excelsa</i> (Blume) Merr.               | Neoe  |
| 91 | <i>Oroxylum indicum</i> (L.) Benth. Ex Kurz           | Oroi  |
| 92 | <i>Pahudia martabanica</i> Prain                      | Pahm  |
| 93 | <i>Parashorea stellata</i> Kurz                       | Pars  |
| 94 | <i>Pentace griffithii</i> King                        | Peng  |
| 95 | <i>Pentacme siamensis</i> (Miq.) kurz                 | Pens  |

---



|     |                                                     |      |
|-----|-----------------------------------------------------|------|
| 96  | <i>Premna latifolia</i> Roxb.                       | Prel |
| 97  | <i>Premna pyramidata</i> Wall. Ex Schauer           | Prep |
| 98  | <i>Protium serrata</i> (Wall. Ex Colebr.) Engl.     | Pros |
| 99  | <i>Pterocarpus macrocarpus</i> Kurz                 | Ptem |
| 100 | <i>Pterocymbium tinctorium</i> Merr.                | Ptet |
| 101 | <i>Pterospermum acerifolium</i> (L.) Willd.         | Ptea |
| 102 | <i>Pterospermum semisagittum</i> Kuntze             | Ptes |
| 103 | <i>Quercus brandisiana</i> Kurz                     | Queb |
| 104 | <i>Randia uliginosa</i> (Retz.) Poir.               | Ranu |
| 105 | <i>Rinorea bengalensis</i> (Wall.) Kuntze           | Rinb |
| 106 | <i>Azadirachta indica</i> A.Juss.                   | Oths |
| 107 | <i>Salmalia insignis</i> (Wall.) Schott & Endl      | Sali |
| 108 | <i>Salmalia malabarica</i> (DC.) Schott & Endl      | Salm |
| 109 | <i>Sapindus</i> spp.                                | Saps |
| 110 | <i>Sapium insigne</i> (Royle) Trimen                | Sapi |
| 111 | <i>Schima noronhae</i> Reinw. ex Blume              | Schn |
| 112 | <i>Schleichera oleosa</i> (Lour.) Oken              | Scho |
| 113 | <i>Semicarpus anacardium</i> L.f.                   | Sema |
| 114 | <i>Shorea oblongifolia</i> Thw.                     | Shoo |
| 115 | <i>Sideroxylon tomentosum</i> Roxb.                 | Sidt |
| 116 | <i>Spondias pinnata</i> (L. f.) Kurz                | Spop |
| 117 | <i>Sterculia</i> spp.                               | Stes |
| 118 | <i>Stereospermum fimbriatum</i> Wall. ex G. Don     | Stef |
| 119 | <i>Stereospermum personatum</i> (Hassk.) Chatterjee | Step |
| 120 | <i>Strychnos nux-blanda</i> A.W. Hill               | Strn |
| 121 | <i>Swintonia floribunda</i> Griff.                  | Swif |
| 122 | <i>Tectona hamiltoniana</i> Wall.                   | Tech |
| 123 | <i>Terminalia belerica</i> (Gaertn.) Roxb.          | Terb |
| 124 | <i>Terminalia chebula</i> Retz.                     | Terc |
| 125 | <i>Terminalia oliveri</i> Brandis.                  | Tero |
| 126 | <i>Terminalia pyrifolia</i> Kurz                    | Terp |
| 127 | <i>Terminalia tomentosa</i> (Roxb.) Wight & Arn     | Tert |
| 128 | <i>Tetrameles nudiflora</i> R.Br.                   | Tetn |
| 129 | <i>Tristania burmanica</i> Griff.                   | Trib |
| 130 | <i>Vitex limonifolia</i> Wall. Ex C.B.Clarke        | Vitl |
| 131 | <i>Vitex pubescens</i> Vahl                         | Vitp |
| 132 | <i>Wendlandia glabrata</i> DC.                      | Weng |
| 133 | <i>Xerospermum noronhianum</i> (Blume) Blume        | Xern |
| 134 | <i>Archidendron jiringa</i> (Jack) I.C.Nielsen      | Arcj |
| 135 | <i>Pittosporum nepaulensis</i> DC.                  | Pitn |

---
